# Supplementary material for: Genome Analysis of Coxsackievirus A4 Isolates From Hand, Foot, and Mouth Disease Cases in Shandong, China
Source: PubMed Central journal article supplement (PMC6513881; doi:10.3389/fmicb.2019.01001), 2019-05-07

**Supplemental Figure S1** | Spatio-temporal distribution of the *VPI* gene sequences from CVA4 strains available in GenBank. (A) Collection date; (B) Collection location.

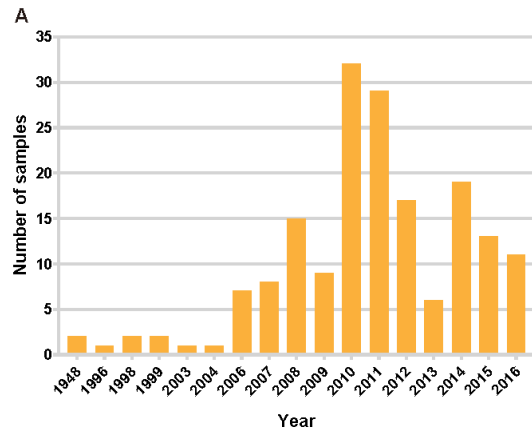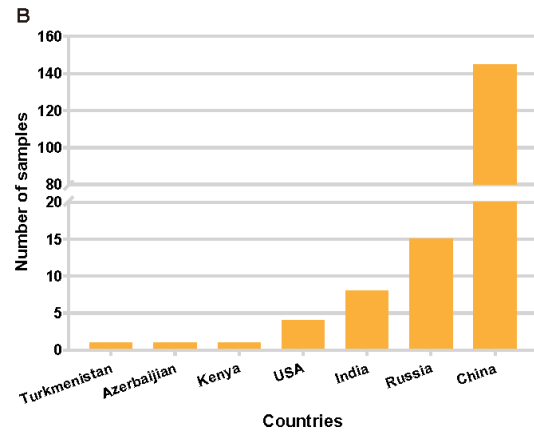

Supplement: Data_Sheet_1.pdf [file Data_Sheet_1.pdf]
