# Supplementary material for: Genome Analysis of Coxsackievirus A4 Isolates From Hand, Foot, and Mouth Disease Cases in Shandong, China
Source: PubMed Central journal article supplement (PMC6513881; doi:10.3389/fmicb.2019.01001), 2019-05-07

**Supplemental Figure S2 | The maximum likelihood phylogenetic tree of the complete CVA4 *VPI* gene (915 nts) sequences constructed using RAxML v8.1.6.**

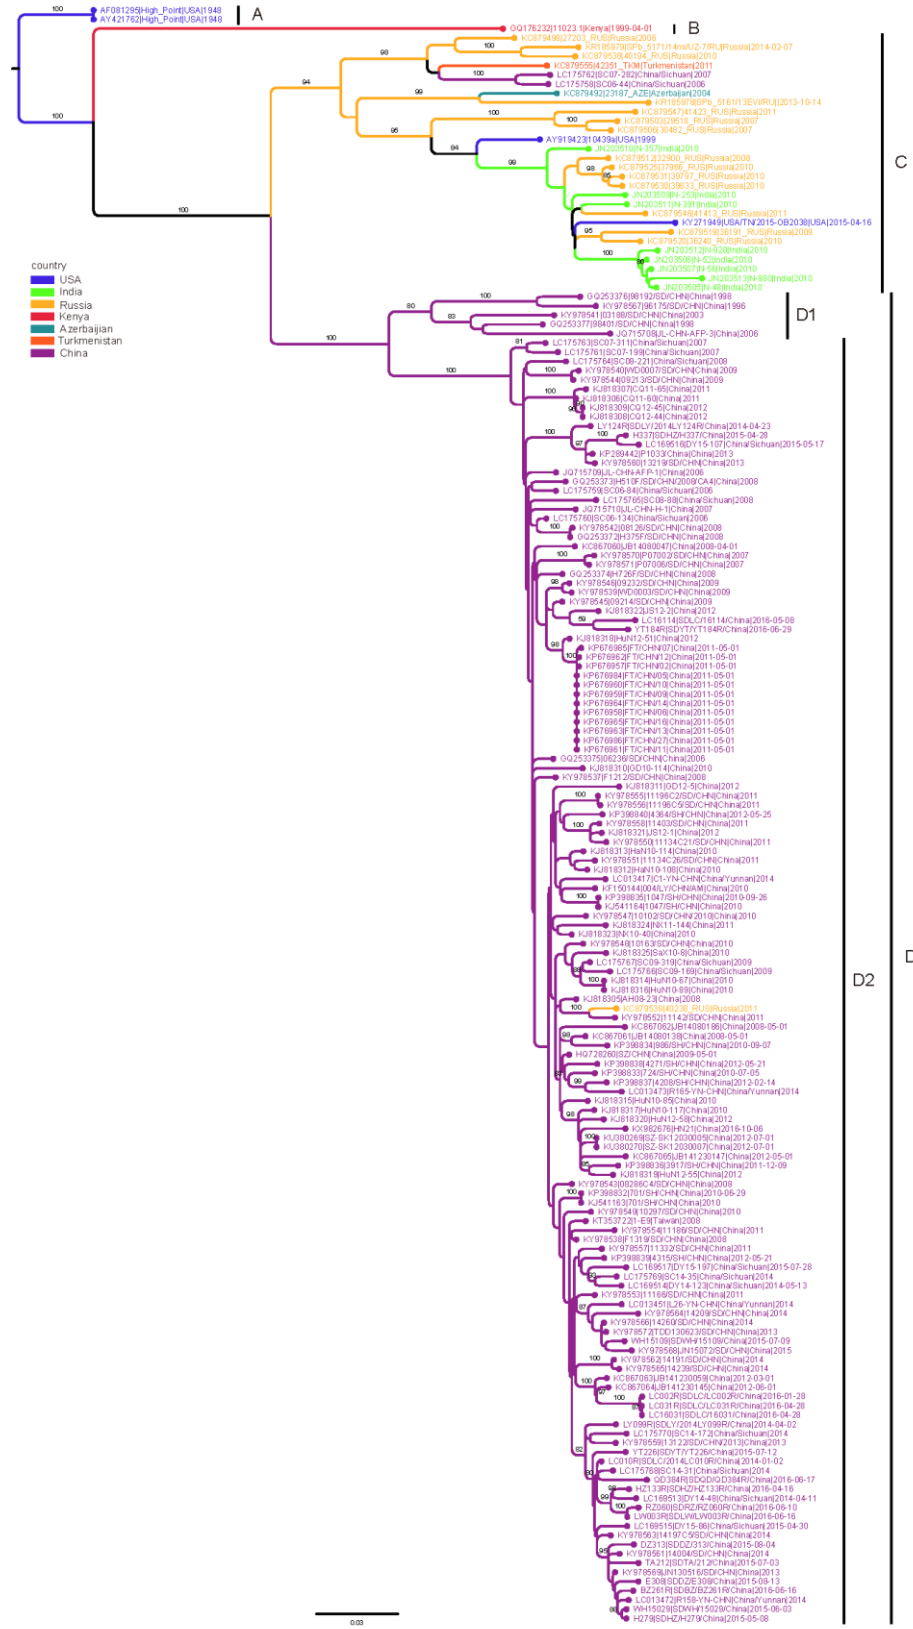

Supplement: Data_Sheet_2.pdf [file Data_Sheet_2.pdf]
